# Supplementary material
Source: PubMed Central journal article supplement (PMC10369213)
Supplement: jama-e2311210-s001.pdf [file jama-e2311210-s001.pdf]

## Supplemental Online Content

Cameron NA, Yee LM, Dolan BM, O'Brien MJ, Greenland P, Khan SS. Trends in cardiovascular health counseling among postpartum individuals. *JAMA*. doi:10.1001/jama.2023.11210

**eTable 1.** Sociodemographic Characteristics of All Individuals With a Live Birth, Those Excluded From the Analysis and the Final Analytic Sample, 2016-2020

**eTable 2.** Prevalence of Prepregnancy and Pregnancy-Related Cardiovascular Disease Risk Factors Among All Individuals With a Live Birth, Those Excluded From the Analysis, and the Final Analytic Sample, 2016-2020

**eTable 3.** Average Annual Percent Change (APC) in Self-Reported Cardiovascular Health Counseling From 2016-2019 (Pre-COVID) and 2016-2020 Overall, by Sociodemographic Characteristics, and Peripartum Cardiovascular Disease Risk Factors

**eTable 4.** Age-Standardized, Weighted<sup>a</sup> Percent (95% CI) and Average Annual Percent Change (%/y) (95% CI) in Self-Reported Postpartum Cardiovascular Health Counseling by Prepregnancy Cardiovascular Risk Factor and Adverse Pregnancy Outcome Status From 2016-2020

**eTable 5.** Weighted<sup>a</sup> Percent (95% CI) and Adjusted<sup>b</sup> Odds Ratios of Self-Reported, Postpartum Cardiovascular Health Counseling Among Individuals With Cardiovascular Risk Factors and Adverse Pregnancy Outcomes Compared With Those Without Risk Factors, 2016-2020

**eTable 6.** Weighted<sup>a</sup> Percent (95% CI) and Average Annual Percent Change (%/y) (95% CI) in Postpartum Cardiovascular Health Counseling by Age, Educational Status, and Postpartum Insurance

**eTable 7.** Unadjusted Risk Ratios of Self-Reported Postpartum Cardiovascular Health Counseling Among Those With Cardiovascular Disease Risk Factors<sup>a</sup> Compared With Those Without Risk Factors by Age, Educational Status, and Postpartum Insurance

This supplemental material has been provided by the authors to give readers additional information about their work.

**eTable 1.** Sociodemographic Characteristics of All Individuals With a Live Birth, Those Excluded From The Analysis and the Final Analytic Sample, 2016-2020

|                                       | All with a live birth | Excluded from analysis                          |                         |                          | Analytic Sample |
|---------------------------------------|-----------------------|-------------------------------------------------|-------------------------|--------------------------|-----------------|
|                                       |                       | Did not attend or missing postpartum visit data | Missing counseling data | Missing risk factor data |                 |
|                                       | N=206,080             | N=25,982                                        | N=1,851                 | N=10,543                 | N=167,705       |
| <b>Age group</b>                      |                       |                                                 |                         |                          |                 |
| N with available subgroup data        | 206,072               | 25,980                                          | 1,851                   | 10,542                   | 167,699         |
| < 20 years (%)                        | 4.3                   | 7.3                                             | 5.1                     | 5.2                      | 3.8             |
| 20-24 years (%)                       | 18.5                  | 25.4                                            | 15.5                    | 19.8                     | 17.4            |
| 25-29 years (%)                       | 29.0                  | 29.6                                            | 30.0                    | 27.3                     | 29.0            |
| 30-34 years (%)                       | 29.6                  | 22.3                                            | 27.5                    | 27.2                     | 30.8            |
| 35-39 years (%)                       | 15.2                  | 11.9                                            | 16.1                    | 15.6                     | 15.7            |
| ≥ 40 years (%)                        | 3.4                   | 3.4                                             | 5.7                     | 4.8                      | 3.3             |
| <b>Race or Ethnicity</b>              |                       |                                                 |                         |                          |                 |
| N with available subgroup data        | 204,688               | 25,741                                          | 1,831                   | 10,442                   | 166, 674        |
| American Indian or Alaskan Native (%) | 0.8                   | 1.5                                             | 0.4                     | 0.5                      | 0.7             |
| Asian or Pacific Islander (%)         | 5.4                   | 4.9                                             | 10.2                    | 7.2                      | 5.3             |
| Hispanic (%)                          | 18.9                  | 27.1                                            | 27.2                    | 41.1                     | 16.2            |
| Non-Hispanic Black (%)                | 15.2                  | 21.2                                            | 18.9                    | 15.5                     | 14.3            |
| Non-Hispanic White (%)                | 56.7                  | 41.4                                            | 39.3                    | 33.0                     | 60.6            |
| Other Non-White or Multiracial (%)    | 3.1                   | 3.9                                             | 4.0                     | 2.7                      | 3.0             |
| <b>Language of Survey</b>             |                       |                                                 |                         |                          |                 |
| N with available subgroup data        | 208,080               | 25,982                                          | 1,851                   | 10,542                   | 167, 705        |
| English                               | 91.1                  | 84.9                                            | 80.0                    | 67.4                     | 93.7            |
| Spanish                               | 8.7                   | 15.0                                            | 19.1                    | 31.6                     | 6.2             |
| Chinese                               | 0.2                   | 0.1                                             | 0.9                     | 1.0                      | 0.2             |
| <b>Education</b>                      |                       |                                                 |                         |                          |                 |
| N with available subgroup data        | 204, 229              | 25,618                                          | 1,826                   | 10,371                   | 166, 414        |
| High School or Less (%)               | 36.9                  | 60.1                                            | 51.0                    | 57.9                     | 32.1            |
| Greater than High School (%)          | 63.1                  | 39.9                                            | 49.0                    | 42.1                     | 67.9            |
| <b>Postpartum Insurance</b>           |                       |                                                 | 0.0                     |                          |                 |
| N with available subgroup data        | 203,083               | 25,435                                          | 1,772                   | 10,112                   | 165,764         |
| Any Private Insurance (%)             | 53.7                  | 28.2                                            | 41.1                    | 36.3                     | 58.5            |
| Medicaid (%)                          | 29.2                  | 44.3                                            | 32.3                    | 29.8                     | 27.0            |
| Other Government Insurance (%)        | 3.7                   | 4.1                                             | 3.7                     | 4.7                      | 3.6             |
| Other Insurance (%)                   | 2.9                   | 4.3                                             | 6.2                     | 5.0                      | 2.5             |
| No Insurance (%)                      | 10.5                  | 19.0                                            | 16.6                    | 24.2                     | 8.4             |

**eTable 2.** Prevalence of Prepregnancy and Pregnancy-Related Cardiovascular Disease Risk Factors Among All Individuals With a Live Birth, Those Excluded From the Analysis, and the Final Analytic Sample, 2016-2020

|                                                      | All with a live birth |      | Excluded from analysis                          |      |                         |      | Analytic sample |      |
|------------------------------------------------------|-----------------------|------|-------------------------------------------------|------|-------------------------|------|-----------------|------|
|                                                      |                       |      | Did not attend or missing postpartum visit data |      | Missing counseling data |      |                 |      |
|                                                      | N in subgroup         | %    | N in subgroup                                   | %    | N in subgroup           | %    | N in subgroup   | %    |
| <b>Prepregnancy Risk Factors</b>                     |                       |      |                                                 |      |                         |      |                 |      |
| Any Prepregnancy Risk Factor                         | 196,045               | 30.0 | 23,759                                          | 32.6 | 1,573                   | 30.3 | 167,705         | 29.3 |
| Prepregnancy diabetes                                | 203,832               | 3.2  | 25,553                                          | 3.6  | 1,576                   | 4.1  | 167,705         | 3.2  |
| Prepregnancy hypertension                            | 204,172               | 5.3  | 25,632                                          | 6.8  | 1,771                   | 6.0  | 167,705         | 5.1  |
| Prepregnancy obesity                                 | 196,459               | 25.9 | 23,745                                          | 27.2 | 1,590                   | 24.0 | 167,705         | 25.9 |
| <b>Adverse Pregnancy Outcomes</b>                    |                       |      |                                                 |      |                         |      |                 |      |
| Any adverse pregnancy outcome                        | 203,541               | 24.5 | 24,791                                          | 25.7 | 1,761                   | 26.4 | 167,705         | 24.1 |
| Gestational Diabetes                                 | 203,323               | 8.9  | 24,645                                          | 8.8  | 1,762                   | 12.1 | 167,705         | 8.7  |
| Hypertensive Disorders of Pregnancy                  | 203,205               | 11.0 | 24,656                                          | 10.2 | 1,741                   | 9.9  | 167,705         | 11.2 |
| Preterm Birth                                        | 205,850               | 9.0  | 25,915                                          | 11.2 | 1,848                   | 9.8  | 167,705         | 8.8  |
| <b>Number of Cardiovascular Disease Risk Factors</b> |                       |      |                                                 |      |                         |      |                 |      |
| No Risk Factors                                      | 206,080               | 57.0 | 25,982                                          | 57.9 | 1,851                   | 57.1 | 167,705         | 56.5 |
| One Risk Factors                                     | 206,080               | 28.2 | 25,982                                          | 30.1 | 1,851                   | 29.2 | 167,705         | 28.3 |
| Two or More Risk Factors                             | 206,080               | 14.9 | 25,982                                          | 14.6 | 1,851                   | 13.7 | 167,705         | 15.3 |

**eTable 3.** Average Annual Percent Change (APC) in Self-Reported Cardiovascular Health Counseling From 2016-2019 (Pre-COVID) and 2016-2020, Overall, by Sociodemographic Characteristics and Peripartum Cardiovascular Disease Risk Factors

|                                                  | <b>APC (%/year),<br/>2016-2019</b> | <b>APC (%/year),<br/>2016-2020</b> |
|--------------------------------------------------|------------------------------------|------------------------------------|
| <b>Overall</b>                                   | -0.9 (-1.5, -0.5)                  | -1.1 (-1.3, -0.8)                  |
| <b>Age (years)</b>                               |                                    |                                    |
| < 20                                             | -0.2 (-4.1, 3.8)                   | 0.0 (-1.7, 1.8)                    |
| 20-24                                            | -0.6 (-2.1, 0.8)                   | -1.1 (-2.2, 0.0)                   |
| 25-29                                            | -1.3 (-2.1, -0.4)                  | -1.1 (-1.6, -0.5)                  |
| 30-34                                            | -0.5 (-2.6, 1.6)                   | -0.8 (-1.9, 0.2)                   |
| 35-39                                            | -1.6 (-3.3, 0.1)                   | -1.4 (-2.2, -0.5)                  |
| > 40                                             | -0.8 (-13.5, 13.8)                 | -1.4 (-7.1, 4.7)                   |
| <b>Race or Ethnicity</b>                         |                                    |                                    |
| American Indian or Alaskan Native                | -1.0 (-8.4, 6.9)                   | 0.3 (-3.8, 4.7)                    |
| Asian or Pacific Islander                        | 0.1 (-5.1, 5.5)                    | -0.4 (-2.9, 2.2)                   |
| Hispanic                                         | -1.1 (-4.9, 2.9)                   | -1.0 (-2.7, 0.7)                   |
| Non-Hispanic Black                               | 0.0 (-1.7, 1.8)                    | -0.5 (-1.6, 0.7)                   |
| Non-Hispanic White                               | -1.4 (-2.2, -0.5)                  | -1.5 (-2.0, -1.0)                  |
| Other                                            | 0.0 (-4.6, 4.8)                    | -0.1 (-2.1, 1.9)                   |
| <b>Education</b>                                 |                                    |                                    |
| ≤ High School                                    | -0.1 (-1.0, 0.8)                   | -0.4 (-1.1, 0.3)                   |
| > High School                                    | -1.4 (-1.7, -1.1)                  | -1.4 (-1.5, -1.2)                  |
| <b>Postpartum Insurance</b>                      |                                    |                                    |
| Any Private Insurance                            | -1.0 (-2.4, 0.5)                   | -1.2 (-2.0, -0.4)                  |
| No Private Insurance                             | -1.0 (-2.2, 0.2)                   | -1.0 (-1.5, -0.5)                  |
| <b>Pre-pregnancy cardiovascular risk factor</b>  |                                    |                                    |
| Any prepregnancy risk factor                     | 0.1 (-1.3, 1.6)                    | -0.2 (-1.1, 0.7)                   |
| Prepregnancy diabetes                            | 1.5 (-3.8, 7.1)                    | 1.8 (-0.5, 4.1)                    |
| Prepregnancy hypertension                        | 2.1 (-0.1, 4.4)                    | 1.1 (-1.9, 3.2)                    |
| Prepregnancy obesity                             | 0.0 (-1.2, 1.1)                    | -0.3 (-1.3, 0.4)                   |
| <b>Adverse pregnancy outcomes</b>                |                                    |                                    |
| Any adverse pregnancy outcome                    | -1.8 (-2.4, -1.3)                  | -1.5 (-2.2, -0.8)                  |
| Gestational diabetes                             | -2.3 (-5.4, 0.9)                   | -0.9 (-3.2, 1.7)                   |
| Hypertensive disorders of pregnancy              | -2.4 (-4.7, -0.1)                  | -2.2 (-3.2, -1.2)                  |
| Preterm birth                                    | -1.0 (-3.4, 1.5)                   | -0.9 (-1.9, 0.2)                   |
| <b>Total cardiovascular disease risk factors</b> |                                    |                                    |
| None                                             | -1.3 (-2.3, -0.4)                  | -1.4 (-1.8, -1.0)                  |
| One Risk Factor                                  | -0.8 (-2.2, 0.7)                   | -0.7 (-1.3, -0.7)                  |
| Two or more risk factors                         | -0.6 (-1.3, 0.2)                   | -0.8 (-1.3, -0.3)                  |

**eTable 4.** Age-Standardized, Weighted<sup>a</sup> Percent (95% CI) and Average Annual Percent Change (%/y) (95% CI) in Self-Reported Postpartum Cardiovascular Health Counseling by Prepregnancy Cardiovascular Risk Factor and Adverse Pregnancy Outcome Status From 2016-2020

|                                                                    | Percent (95% CI) with postpartum cardiovascular health counseling |                         |                         |                         |                         | Average Annual Percent Change (95% CI) |
|--------------------------------------------------------------------|-------------------------------------------------------------------|-------------------------|-------------------------|-------------------------|-------------------------|----------------------------------------|
|                                                                    | 2016<br>(N = 1,655,515)                                           | 2017<br>(N = 1,604,942) | 2018<br>(N = 1,829,709) | 2019<br>(N = 1,922,077) | 2020<br>(N = 1,702,215) | 2016-2020                              |
| <b>Any Poor Prepregnancy Clinical Cardiovascular Health Factor</b> | 60.17<br>(58.40, 61.90)                                           | 60.78<br>(59.23, 62.31) | 60.14<br>(58.71, 61.55) | 60.74<br>(59.21, 62.25) | 59.63<br>(58.12, 61.13) | -0.2<br>(-1.1, 0.7)                    |
| Diabetes                                                           | 56.70<br>(51.81, 61.46)                                           | 59.20<br>(54.60, 63.63) | 60.85<br>(56.50, 65.02) | 59.12<br>(54.11, 63.92) | 62.12<br>(57.39, 66.64) | 1.8<br>(-0.5, 4.1)                     |
| Hypertension                                                       | 58.04<br>(54.00, 61.97)                                           | 60.19<br>(56.58, 63.70) | 61.53<br>(58.18, 64.78) | 61.90<br>(58.09, 65.57) | 60.84<br>(57.20, 64.36) | 1.1<br>(-1.9, 3.2)                     |
| Obesity                                                            | 60.88<br>(58.96, 62.74)                                           | 60.90<br>(59.22, 62.55) | 60.40<br>(58.87, 61.90) | 61.00<br>(59.38, 62.60) | 59.82<br>(58.20, 61.41) | -0.3<br>(-1.3, 0.4)                    |
| <b>Any Adverse Pregnancy Outcome</b>                               | 60.77<br>(58.62, 62.56)                                           | 59.39<br>(57.73, 61.02) | 58.64<br>(57.12, 60.15) | 57.35<br>(55.75, 58.93) | 57.37<br>(55.79, 58.94) | -1.5<br>(-2.2, -0.8)                   |
| Gestational Diabetes                                               | 63.72<br>(60.25, 67.05)                                           | 62.97<br>(59.89, 65.96) | 62.30<br>(59.33, 65.19) | 59.15<br>(56.07, 61.15) | 62.33<br>(59.49, 65.10) | -0.9<br>(-3.2, 1.7)                    |
| Hypertensive Disorders of Pregnancy                                | 60.59<br>(57.81, 63.31)                                           | 57.90<br>(55.41, 60.35) | 57.66<br>(55.36, 59.93) | 55.90<br>(53.58, 58.20) | 55.08<br>(52.70, 57.44) | -2.2<br>(-3.3, -1.2)                   |
| Preterm Birth                                                      | 59.69<br>(57.14, 62.19)                                           | 58.28<br>(55.77, 60.74) | 57.41<br>(55.22, 59.58) | 58.03<br>(55.83, 60.20) | 57.15<br>(54.91, 59.36) | -0.9<br>(-1.9, 0.2)                    |

<sup>a</sup> Weighted to account for PRAMS sampling design

**eTable 5.** Weighted<sup>a</sup> Percent (95% CI) and Adjusted<sup>b</sup> Odds Ratios of Self-Reported, Postpartum Cardiovascular Health Counseling Among Individuals With Cardiovascular Risk Factors and Adverse Pregnancy Outcomes Compared With Those Without Risk Factors, 2016-2020

|                                                 | Percent (95% CI) with Postpartum CVH Counseling |                      | RR Counseling <sup>b</sup> |
|-------------------------------------------------|-------------------------------------------------|----------------------|----------------------------|
|                                                 | Without Risk Factor                             | With Risk Factor     |                            |
| <b>Prepregnancy Cardiovascular Risk Factors</b> |                                                 |                      |                            |
| Any Risk Factor                                 | 54.85 (54.39, 55.30)                            | 60.18 (59.49, 60.86) | 1.08 (1.07, 1.10)          |
| Diabetes                                        | 56.31 (55.92, 56.69)                            | 59.46 (57.37, 61.51) | 1.05 (1.02, 1.09)          |
| Hypertension                                    | 56.19 (55.80, 56.58)                            | 60.40 (58.79, 61.99) | 1.07 (1.04, 1.10)          |
| Obesity                                         | 54.99 (54.55, 55.43)                            | 60.47 (59.73, 61.20) | 1.09 (1.07, 1.10)          |
| <b>Adverse Pregnancy Outcomes</b>               |                                                 |                      |                            |
| Any Adverse Pregnancy Outcome                   | 55.77 (55.32, 56.21)                            | 58.43 (57.70, 59.15) | 1.05 (1.03, 1.06)          |
| Gestational Diabetes                            | 55.92 (55.52, 56.32)                            | 61.53 (60.26, 62.79) | 1.11 (1.08, 1.13)          |
| Hypertensive Disorder of Pregnancy              | 56.29 (55.89, 56.69)                            | 57.35 (56.25, 58.44) | 1.02 (1.00, 1.05)          |
| Preterm Birth                                   | 56.25 (55.85, 56.65)                            | 58.02 (56.98, 59.05) | 1.02 (1.00, 1.04)          |

<sup>a</sup> Weighted to account for PRAMS sampling design

<sup>b</sup> RR of counseling given presence of risk factor adjusted for year of delivery, maternal age, education ( $\leq$  high school or  $>$  high school education) and postpartum insurance type (any private insurance or no private insurance). Referent for all comparisons is individuals with no risk factors.

**eTable 6.** Weighted<sup>a</sup> Percent (95% CI) and Average Annual Percent Change (%/y) (95% CI) in Postpartum Cardiovascular Health Counseling by Age, Educational Status, and Postpartum Insurance

|                                         | Overall<br>(2016-2020) | Percent (95% CI) with postpartum cardiovascular health counseling |                         |                         |                         |                         | Average Annual<br>Percent Change<br>(95% CI) |
|-----------------------------------------|------------------------|-------------------------------------------------------------------|-------------------------|-------------------------|-------------------------|-------------------------|----------------------------------------------|
|                                         |                        | 2016<br>(N = 1,655,515)                                           | 2017<br>(N = 1,604,942) | 2018<br>(N = 1,829,709) | 2019<br>(N = 1,922,077) | 2020<br>(N = 1,702,215) | 2016-2020                                    |
| <b>Age</b>                              |                        |                                                                   |                         |                         |                         |                         |                                              |
| < 20                                    | 63.8 (61.8, 65.7)      | 64.0 (59.4, 68.5)                                                 | 64.3 (60, 68.4)         | 62.2 (58.1, 66.2)       | 64.3 (59.9, 68.5)       | 64.1 (59.6, 68.3)       | 0.0 (-1.7, 1.8)                              |
| 20-24                                   | 59.4 (58.5, 60.3)      | 60.2 (57.9, 62.5)                                                 | 60.5 (58.5, 62.6)       | 59.4 (57.4, 61.3)       | 59.4 (57.3, 61.5)       | 57.6 (55.5, 59.7)       | -1.1 (-2.2, 0)                               |
| 25-29                                   | 57.0 (56.3, 57.7)      | 58.5 (56.8, 60.2)                                                 | 57.4 (55.8, 58.9)       | 56.7 (55.2, 58.1)       | 56.3 (54.7, 57.8)       | 56.0 (54.4, 57.6)       | -1.1 (-1.6, -0.5)                            |
| 30-34                                   | 54.5 (53.8, 55.2)      | 55.7 (54.0, 57.3)                                                 | 54.3 (52.8, 55.8)       | 54.8 (53.4, 56.2)       | 54.5 (53.0, 56.0)       | 53.2 (51.7, 54.7)       | -0.8 (-1.9, 0.2)                             |
| 35-39                                   | 54.3 (53.3, 55.2)      | 55.7 (53.4, 58.1)                                                 | 55.3 (53.2, 57.3)       | 54.7 (52.7, 56.6)       | 53.0 (50.9, 55.1)       | 53.2 (51.0, 55.3)       | -1.4 (-2.2, -0.5)                            |
| > 40                                    | 55.3 (53.2, 57.3)      | 54.0 (48.9, 59.0)                                                 | 57.9 (53.1, 62.4)       | 58.8 (54.6, 62.8)       | 52.5 (48.0, 56.9)       | 53.6 (49.0, 58.1)       | -1.4 (-7.1, 4.7)                             |
| <b>Race or Ethnicity</b>                |                        |                                                                   |                         |                         |                         |                         |                                              |
| American Indian or Alaskan Native       | 64.0 (61.3, 66.6)      | 65.3 (60.7, 69.6)                                                 | 60.6 (55.3, 65.8)       | 64.6 (58.4, 70.2)       | 62.5 (55.5, 68.9)       | 66.8 (59.5, 73.5)       | 0.3 (-3.8, 4.7)                              |
| Asian or Pacific Islander               | 64.5 (63.1, 66.0)      | 65.8 (62.2, 69.2)                                                 | 62.6 (59.3, 65.8)       | 65.7 (62.7, 68.6)       | 64.8 (61.7, 67.8)       | 63.3 (60.0, 66.6)       | -0.4 (-2.9, 2.2)                             |
| Hispanic                                | 60.7 (59.7, 61.7)      | 61.4 (59.0, 63.7)                                                 | 61.7 (59.6, 63.9)       | 61.8 (59.8, 63.7)       | 59.1 (56.9, 61.3)       | 59.7 (57.5, 61.9)       | -1.0 (-2.7, 0.7)                             |
| Non-Hispanic Black                      | 69.2 (68.3, 70.1)      | 69.0 (66.5, 71.3)                                                 | 70.2 (68.1, 72.3)       | 69.3 (67.2, 71.3)       | 69.5 (67.6, 71.4)       | 68.0 (66.0, 69.9)       | -0.5 (-1.6, 0.7)                             |
| Non-Hispanic White                      | 51.3 (50.8, 51.8)      | 52.7 (51.5, 53.9)                                                 | 52.1 (51.1, 53.2)       | 51.6 (50.6, 52.6)       | 50.5 (49.4, 51.6)       | 49.6 (48.5, 50.7)       | -1.5 (-2.0, -1.0)                            |
| Other                                   | 59.7 (57.7, 61.6)      | 60.7 (55.9, 65.3)                                                 | 58.8 (54.1, 63.3)       | 58.7 (54.6, 62.6)       | 60.8 (56.2, 65.1)       | 59.3 (54.9, 63.6)       | -0.1 (-2.1, 1.9)                             |
| <b>Education</b>                        |                        |                                                                   |                         |                         |                         |                         |                                              |
| ≤ High School                           | 60.9 (60.2, 61.6)      | 61.4 (59.7, 63.1)                                                 | 60.9 (59.3, 62.4)       | 61.0 (59.6, 62.5)       | 61.2 (59.7, 62.7)       | 60.1 (58.5, 61.6)       | -0.4 (-1.1, 0.3)                             |
| > High School                           | 54.2 (53.8, 54.7)      | 55.8 (54.7, 56.9)                                                 | 55.0 (54.0, 55.9)       | 54.3 (53.4, 55.2)       | 53.4 (52.4, 54.4)       | 52.8 (51.8, 53.8)       | -1.4 (-1.5, -1.2)                            |
| <b>Postpartum Insurance<sup>b</sup></b> |                        |                                                                   |                         |                         |                         |                         |                                              |
| Any Private Insurance                   | 53.0 (52.5, 53.5)      | 54.2 (53, 55.4)                                                   | 53.5 (52.4, 54.6)       | 53.6 (52.6, 54.6)       | 52.4 (51.3, 53.5)       | 51.5 (50.4, 52.6)       | -1.2 (-2.0, -0.4)                            |
| No Private Insurance                    | 61.1 (60.5, 61.7)      | 62.3 (60.8, 63.8)                                                 | 61.9 (60.6, 63.2)       | 60.7 (59.4, 61.9)       | 60.7 (59.3, 62)         | 59.9 (58.6, 61.3)       | -1.0 (-1.5, -0.5)                            |

<sup>a</sup> Weighted to account for PRAMS complex sampling design

<sup>b</sup> Insurance at 2-6 months postpartum

**eTable 7.** Unadjusted Risk Ratios of Self-Reported Postpartum Cardiovascular Health Counseling Among Those With Cardiovascular Disease Risk Factors<sup>a</sup> Compared With Those Without Risk Factors by Age, Educational Status, and Postpartum Insurance

|                                   | <b>Unadjusted Risk Ratio of Counseling<sup>b</sup></b> |                                 |
|-----------------------------------|--------------------------------------------------------|---------------------------------|
|                                   | <b>One Risk Factor</b>                                 | <b>Two or More Risk Factors</b> |
| <b>Age</b>                        |                                                        |                                 |
| < 20                              | 1.08 (1.00, 1.15)                                      | 1.10 (1.01, 1.20)               |
| 20-24                             | 1.00 (0.97, 1.04)                                      | 1.07 (1.00, 1.12)               |
| 25-29                             | 1.05 (1.02, 1.08)                                      | 1.10 (1.06, 1.14)               |
| 30-34                             | 1.09 (1.06, 1.13)                                      | 1.14 (1.11, 1.18)               |
| 35-39                             | 1.09 (1.05, 1.13)                                      | 1.16 (1.11, 1.21)               |
| > 40                              | 1.17 (1.07, 1.27)                                      | 1.23 (1.12, 1.34)               |
| <b>Race or Ethnicity</b>          |                                                        |                                 |
| American Indian or Alaskan Native | 0.97 (0.88, 1.06)                                      | 1.00 (0.89, 1.12)               |
| Asian or Pacific Islander         | 1.07 (1.01, 1.13)                                      | 1.10 (1.03, 1.17)               |
| Hispanic                          | 1.05 (1.10, 1.09)                                      | 1.12 (1.08, 1.17)               |
| Non-Hispanic Black                | 1.02 (0.98, 1.05)                                      | 1.06 (1.03, 1.10)               |
| Non-Hispanic White                | 1.04 (1.02, 1.07)                                      | 1.09 (1.06, 1.12)               |
| Other                             | 1.13 (1.05, 1.22)                                      | 1.09 (1.00, 1.19)               |
| <b>Education</b>                  |                                                        |                                 |
| ≤ High School                     | 1.06 (1.04, 1.09)                                      | 1.11 (1.08, 1.15)               |
| > High School                     | 1.05 (1.03, 1.07)                                      | 1.11 (1.08, 1.13)               |
| <b>Postpartum Insurance</b>       |                                                        |                                 |
| Any Private Insurance             | 1.05 (1.02, 1.07)                                      | 1.11 (1.09, 1.14)               |
| No Private Insurance              | 1.06 (1.04, 1.09)                                      | 1.10 (1.07, 1.13)               |
