# Supplementary material
Source: PubMed Central journal article supplement (PMC10369213)
Supplement: jama-e2311210-s002.pdf [file jama-e2311210-s002.pdf]

## Data Sharing Statement

Cameron. Trends in Cardiovascular Health Counseling Among Postpartum Individuals. *JAMA*. Published July 25, 2023. doi:10.1001/jama.2023.11210

### Data

**Data available:** Yes

**Data types:** Deidentified participant data

**How to access data:** The source data set are publicly available with written permission from the Centers for Disease Control Pregnancy Risk Assessment Monitoring System at <https://www.cdc.gov/prams/prams-data/researchers.htm>. These data are available to researchers whose proposed use of the data has been approved.

**When available:** With publication

### Supporting Documents

**Document types:** Statistical/analytic code

**How to access documents:** The source data set are publicly available with written permission from the Centers for Disease Control Pregnancy Risk Assessment Monitoring System at <https://www.cdc.gov/prams/prams-data/researchers.htm>. These data are available to researchers whose proposed use of the data has been approved. For source code please contact the corresponding author.

**When available:** With publication

### Additional Information

**Who can access the data:** The source data set are publicly available with written permission from the Centers for Disease Control Pregnancy Risk Assessment Monitoring System at <https://www.cdc.gov/prams/prams-data/researchers.htm>. These data are available to researchers whose proposed use of the data has been approved.

**Types of analyses:** The source data set are publicly available with written permission from the Centers for Disease Control Pregnancy Risk Assessment Monitoring System at <https://www.cdc.gov/prams/prams-data/researchers.htm>. These data are available to researchers whose proposed use of the data has been approved.

**Mechanisms of data availability:** The source data set are publicly available with written permission from the Centers for Disease Control Pregnancy Risk Assessment Monitoring System at <https://www.cdc.gov/prams/prams-data/researchers.htm>. These data are available to researchers whose proposed use of the data has been approved.

**Any additional restrictions:** N/A
